# Supplementary material for: Syntheses, structures and luminescent properties of zinc(ii) coordination polymers based on bis(imidazole) and dicarboxylate
Source: Royal Society of Chemistry journal article supplement (doi:10.1039/c0ce00190b), 2010-09-08
Supplement: c0ce00190b.pdf [file c0ce00190b.pdf]

# Syntheses, Structures and Luminescent Properties of Zinc(II) Coordination Polymers Based on Bis(imidazole) and Dicarboxylate

Kai Jiang, Lu-Fang Ma, Xiao-Yuan Sun, Li-Ya Wang

**Table S1. Selected bond lengths (Å) and angles (°) for 1-5**

| <b>1</b>            |            |                     |            |
|---------------------|------------|---------------------|------------|
| Zn(1)-O(1)          | 1.9169(13) | Zn(1)-N(4)#2        | 2.0188(15) |
| Zn(1)-O(3)#1        | 1.9261(12) | Zn(1)-N(1)          | 2.0254(15) |
| O(1)-Zn(1)-O(3)#1   | 119.57(7)  | O(1)-Zn(1)-N(1)     | 110.73(6)  |
| O(1)-Zn(1)-N(4)#2   | 109.56(6)  | O(3)#1-Zn(1)-N(1)   | 103.21(6)  |
| O(3)#1-Zn(1)-N(4)#2 | 112.44(6)  | N(4)#2-Zn(1)-N(1)   | 99.20(6)   |
| <b>2</b>            |            |                     |            |
| Zn(1)-O(4)#1        | 1.9326(16) | Zn(1)-N(4)#2        | 1.999(2)   |
| Zn(1)-O(1)          | 1.9434(16) | Zn(1)-N(1)          | 2.003(2)   |
| O(4)#1-Zn(1)-O(1)   | 113.14(7)  | O(4)#1-Zn(1)-N(1)   | 97.31(8)   |
| O(4)#1-Zn(1)-N(4)#2 | 112.73(8)  | O(1)-Zn(1)-N(1)     | 116.14(8)  |
| O(1)-Zn(1)-N(4)#2   | 107.60(8)  | N(4)#2-Zn(1)-N(1)   | 109.79(9)  |
| <b>3</b>            |            |                     |            |
| Zn(1)-O(2)          | 1.946(2)   | Zn(1)-N(6)#2        | 2.008(3)   |
| Zn(1)-O(4)#1        | 1.953(2)   | Zn(1)-N(1)          | 2.014(3)   |
| O(2)-Zn(1)-O(4)#1   | 115.70(11) | O(2)-Zn(1)-N(1)     | 114.52(12) |
| O(2)-Zn(1)-N(6)#2   | 95.77(11)  | O(4)#1-Zn(1)-N(1)   | 106.34(11) |
| O(4)#1-Zn(1)-N(6)#2 | 115.52(12) | N(6)#2-Zn(1)-N(1)   | 108.89(12) |
| <b>4</b>            |            |                     |            |
| Zn(1)-O(2)          | 1.964(2)   | Zn(1)-N(1)          | 1.997(2)   |
| Zn(1)-O(4)#1        | 1.979(2)   | Zn(1)-N(4)#2        | 2.022(2)   |
| O(2)-Zn(1)-O(4)#1   | 100.86(9)  | O(2)-Zn(1)-N(4)#2   | 106.80(9)  |
| O(2)-Zn(1)-N(1)     | 112.61(10) | O(4)#1-Zn(1)-N(4)#2 | 113.16(9)  |
| O(4)#1-Zn(1)-N(1)   | 109.97(9)  | N(1)-Zn(1)-N(4)#2   | 112.83(10) |
| <b>5</b>            |            |                     |            |
| Zn(1)-O(4)#1        | 1.9837(13) | Zn(1)-O(1)          | 2.009(14)  |
| Zn(1)-N(1)          | 1.9982(17) | Zn(1)-N(3)          | 2.0174(17) |
| O(4)#1-Zn(1)-N(1)   | 102.00(6)  | O(4)#1-Zn(1)-N(3)   | 117.43(7)  |
| O(4)#1-Zn(1)-O(1)   | 98.90(6)   | N(1)-Zn(1)-N(3)     | 115.66(7)  |
| N(1)-Zn(1)-O(1)     | 112.32(6)  | O(1)-Zn(1)-N(3)     | 109.28(7)  |

Symmetry transformations used to generate equivalent atoms:

For **1**, #1 x-1,y,z #2 -x+1/2,y+1/2,-z+1/2 ;

For **2**, #1 x,-y+5/2,z+1/2 #2 -x+1,y+1/2,-z+1/2 ;

For **3**, #1 x+1,y,z #2 x,-y+1/2,z+1/2 ;

For **4**, #1 x,y+1,z #2 x,y-1,z ; For **5**, #1 x,y+1,z.

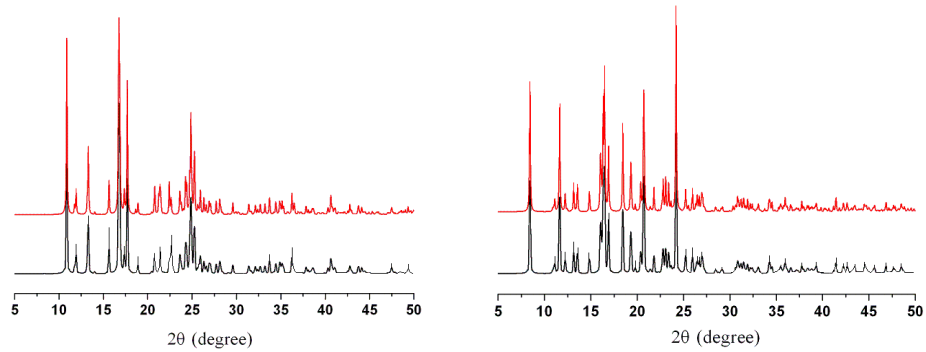

(a)

(b)

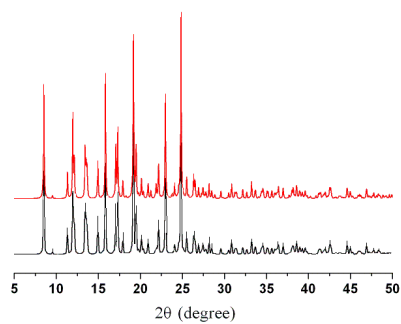

(c)

(d)

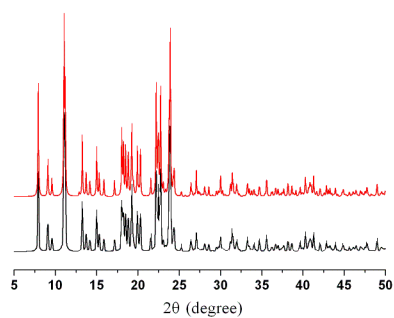

(e)

Figure S1. Simulated (black) and experimental (red) XRPD patterns of 1-5.

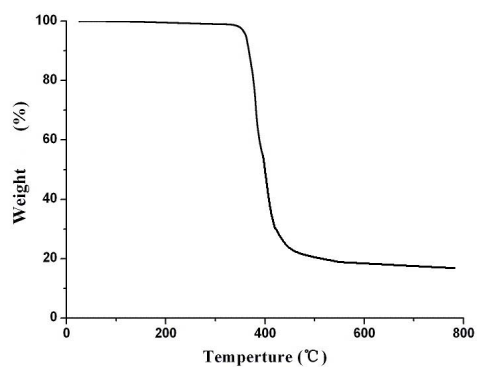

(1)

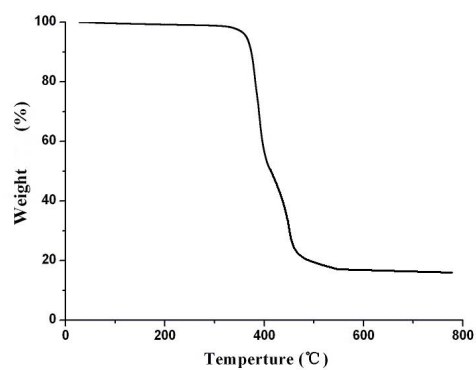

(2)

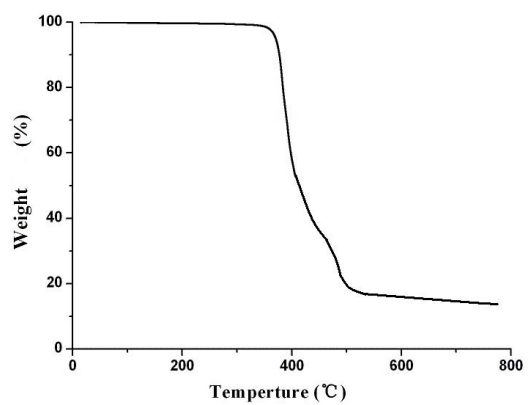

(3)

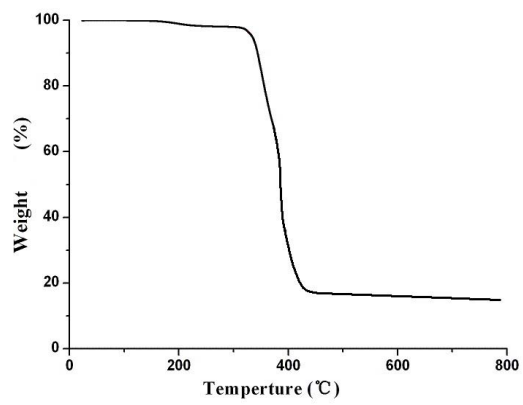

(4)

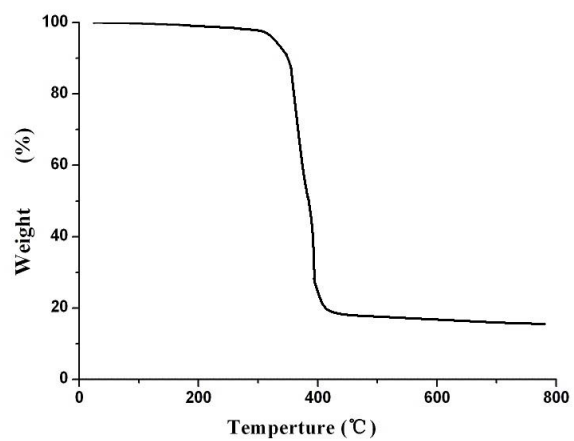

(5)

Figure S2. The TGA of 1-5 in solid state.
